1 **The genomic landscape of tree rot in *Phellinus noxius* and its Hymenochaetales**  
2 **members**

3

4 Chia-Lin Chung\*<sup>+1,2</sup>, Jiaye T Lee<sup>3,4,5</sup>, Mitsuteru Akiba<sup>6</sup>, Hsin-Han Lee<sup>1</sup>, Tzu-Hao  
5 Kuo<sup>3</sup>, Dang Liu<sup>3,7</sup>, Huei-Mien Ke<sup>3</sup>, Toshiro Yokoi<sup>6</sup>, Marylette B Roa<sup>3,8</sup>, Meiyeh J Lu<sup>3</sup>,  
6 Ya-Yun Chang<sup>1</sup>, Pao-Jen Ann<sup>9</sup>, Jyh-Nong Tsai<sup>9</sup>, Chien-Yu Chen<sup>10</sup>, Shean-Shong  
7 Tzean<sup>1</sup>, Yuko Ota<sup>6,11</sup>, Tsutomu Hattori<sup>6</sup>, Norio Sahashi<sup>6</sup>, Ruey-Fen Liou<sup>1,2</sup>, Taisei  
8 Kikuchi\*<sup>12</sup> and Isheng J Tsai\*<sup>+3,4,5,7</sup>

9

10 + Contributed equally

11 \* Corresponding authors: [clchung@ntu.edu.tw](mailto:clchung@ntu.edu.tw), [taisei\\_kikuchi@med.miyazaki-u.ac.jp](mailto:taisei_kikuchi@med.miyazaki-u.ac.jp)  
12 and [ijtsai@gate.sinica.edu.tw](mailto:ijtsai@gate.sinica.edu.tw)

13

14 <sup>1</sup>Department of Plant Pathology and Microbiology, National Taiwan University,  
15 Taiwan

16 <sup>2</sup>Master Program for Plant Medicine, National Taiwan University, Taiwan

17 <sup>3</sup>Biodiversity Research Center, Academia Sinica, Taipei, Taiwan

18 <sup>4</sup>Biodiversity Program, Taiwan International Graduate Program, Academia Sinica and  
19 National Taiwan Normal University

20 <sup>5</sup>Department of Life Science, National Taiwan Normal University

21 <sup>6</sup>Department of Forest Microbiology, Forestry and Forest Products Research Institute,  
22 Tsukuba, Japan

23 <sup>7</sup>Genome and Systems Biology Degree Program, National Taiwan University and  
24 Academia Sinica, Taipei, Taiwan

25 <sup>8</sup>Philippine Genome Center, University of the Philippines, Diliman, Quezon City,  
26 Philippines 1101

27 <sup>9</sup>Plant Pathology Division, Taiwan Agricultural Research Institute

28 <sup>10</sup>Department of Bio-industrial Mechatronics Engineering, National Taiwan  
29 University, Taiwan

30 <sup>11</sup>College of Bioresource Sciences, Nihon University, Fujisawa, Japan

31 <sup>12</sup>Division of Parasitology, Faculty of Medicine, University of Miyazaki, Miyazaki,  
32 Japan

33

34

35 **ABSTRACT**

36

37 **Background**

38 The order Hymenochaetales of filamentous fungi contains some of the most  
39 aggressive wood decayers that have caused major forest incidents as early as 1971. It  
40 is also phylogenetically placed between the well-studied Agaricales and Ustilaginales  
41 orders, making Hymenochaetales species interesting for investigating the evolutionary  
42 transition between the orders of Basidiomycota.

43

44 **Results**

45 We report four whole-genomes from this group including the tree rot pathogen  
46 *Phellinus noxius*, the wood decomposing fungus *Phellinus lamaensis*, the laminated  
47 root rot pathogen *Phellinus sulphurascens*, and the trunk rot pathogen *Porodaedalea*  
48 *pini*. While expansion of transposable elements constitutes the main difference  
49 between these genomes ranging from 31- to 53-megabases, their karyotype is  
50 conserved with distant fungi. We found many genes reflecting their ability as white-  
51 rot fungi, and transcriptome data from *in planta* colonization of *P. noxius* revealed  
52 members of carbohydrate active enzymes, P450s, and nucleotide-binding-  
53 oligomerization-domain like receptors that are upregulated at different infection  
54 phases. Population genomics analyses of 60 *P. noxius* isolates across the Asia Pacific  
55 region revealed extraordinary genetic diversity and mono-/heterokaryotic nature, and  
56 that the isolates can be divided into two genetically separated lineages with  
57 contrasting evolutionary scenarios.

58

59 **Conclusions**

60 These genomes shed light on the basic biology and population genetics of fungal tree  
61 pathogens. The combined genome and transcriptome analysis of *P. noxius* can serve  
62 as a starting point for understanding the survival strategies of this devastating  
63 pathogen, from which new control methods could be developed.

64

65 **Keywords**

66 *Phellinus* – Comparative genomics – Population genomics – Fungal biology – Tree  
67 pathogens

68

69

## 70 INTRODUCTION

71 Under most circumstances, fungi coexist with trees or act as saprotrophs responsible  
72 for carbon and nitrogen cycling in forest systems. However, some fungi are also one  
73 of the dominant groups of pathogens causing diseases in trees. There has been an  
74 emergence of tree disease outbreaks in different parts of the world such as the ash  
75 dieback[1], Dutch elm disease[2], laminated root rot caused by *Phellinus*  
76 *sulphurascens*[3], and brown root rot caused by *Phellinus noxius*[4-6]. Factors  
77 contributing to this phenomenon include climate change[7] and human activity[8]. If  
78 interventions are not implemented early and effective, pathogen infections can kill  
79 millions of trees and the spread can become very difficult to stop[9].

80

81 Hymenochaetales is dominated by wood decay fungi and belongs to Agaricomycetes  
82 of Basidiomycota. Most of which are saprotrophic but some also exhibit pathogenic  
83 lifestyles that have been recorded in major forest incidents as early as 1971 in  
84 different parts of the world[10, 11]. In particular, *P. noxius* has a very wide host range,  
85 spanning more than 200 broadleaved and coniferous tree species (at least 59 families)  
86 including many agricultural, ornamental, and forest trees such as longan, litchi,  
87 camphor, banyan, and pine[12, 13]. Inoculation assays showed that only seven out of  
88 101 tested tree cultivars (92 species) exhibited high resistance[14]. Moreover, despite  
89 the differences in virulence, *P. noxius* isolates exhibited no host specificity[14-16].

90

91 The life cycle of *P. noxius*[13] is thought to be similar to other important root-rotting  
92 basidiomycetes, such as *Armillaria mellea* and *Heterobasidion annosum*. The new  
93 infection can start from previously infected plants/stumps or colonized wood debris,  
94 from which the mycelium of *P. noxius* grows to infect the lateral and tap roots of the  
95 host tree[13]. An invasion to the cortex and lignified xylem is usually observed[17],  
96 sometimes accompanied by gradual expansion of the mycelial mat to the basal stem  
97 (**Figure 1a**). Diseased trees with decayed roots may then show symptoms of foliar  
98 chlorosis, thinning leaves, defoliation, and eventually decline within a few months to  
99 several years. The damaged and fragile roots (**Figure 1b**) also make the trees easily  
100 toppled over by strong winds and heavy rains. Basidiocarps are occasionally formed  
101 on trunks of infected trees (**Figure 1c-d**). The sexual reproduction system of *P. noxius*  
102 has remained unclarified, partly due to the lack of clamp connections for diagnosing  
103 compatibility[13].

104 Brown root rot disease caused by *P. noxius* is widespread in tropical and subtropical  
105 areas in Southeast and East Asia, Oceania, Africa, Central America and the Caribbean.  
106 The geographical distribution appears to be related to the range of growth temperature  
107 range of *P. noxius*: it grows over 10-12°C to 36 °C, with optimum growth at 30 °C. In  
108 the past 20 years, brown root rot disease has become a serious threat to a variety of  
109 perennial fruit trees, ornamental and landscape trees, and shade trees in Taiwan[6]  
110 and in Ryukyu and Ogasawara Islands of Japan[4]. In Australia, it occurs in the  
111 natural and commercial plantation forests and orchards along the east coast, and has  
112 killed many trees in the Greater Metropolitan area of Brisbane Queensland[18]. In  
113 West Africa and China, brown root rot was reported as the most devastating root  
114 disease attacking the rubber plantations[16]. Trees in urban areas and plantation  
115 forestry in Hong Kong and Macao have also been seriously affected[19, 20]. Recent  
116 population genetics studies based on simple sequence repeat (SSR) markers suggested  
117 that *P. noxius* may spread over short distances via root-to-root contact of the hosts,  
118 and the genetically variable basidiospores are likely involved in long-distance  
119 dispersal and the establishment of unique clones in new disease foci[4, 6].

120

121 Here we report the genome sequences of four species from Hymenochaetales: white-  
122 rot fungus *Phellinus noxius*, *Phellinus lamaensis* (wood decomposing fungus that  
123 causes a white pocket rot only on dead heartwood trees), *Phellinus sulphurascens*  
124 (syn. *Coniferiporia sulphurascens*[21]; pathogen responsible for laminated root rot in  
125 Douglas-fir/ true fir), and *Porodaedalea pini* (syn. *Phellinus pini*; trunk pathogen of  
126 conifers). To investigate the genomic basis of tree pathogenicity in these fungi, we  
127 compared: i) these genomes against other representative species of Basidiomycota; ii)  
128 the transcriptomes of basidiocarps and mycelial mat from infected live trees and in  
129 culture; and iii) whole genome sequencing of 60 *P. noxius* isolates from regions  
130 endemic to brown root rot disease. We identified several features that are conserved  
131 throughout basidiomycetes in the genome of *P. noxius* as well as genes upregulated  
132 during infection. Population genomics analyses of *P. noxius* isolates revealed its  
133 bipolar reproductive mode and two major genetic lineages with different evolutionary  
134 scenarios. Together, this study provides insights into an important tree filamentous  
135 pathogen by applying large-scale comparative and population genomics approaches.

136

137

## 138 RESULTS

139

### 140 Genome structure and content

141 We produced a 31.6 Mb *P. noxius* genome reference assembly from a Japanese  
142 KPN91 isolate combining both Pacbio and Illumina technologies. The nuclear  
143 genome of *P. noxius* is assembled into 12 scaffolds with six assembled into  
144 chromosomes from telomere to telomere (**Figure 2**), while the mitochondrial genome  
145 is assembled into a single sequence of 163.4 kb. To date chromosome-level  
146 assemblies are available only for a few basidiomycetous species[22-24] including *P.*  
147 *noxius* (Supplementary Table 1). For a comprehensive understanding of genome  
148 evolution amongst members of the hymenochaetoid clade, we also sequenced and  
149 assembled three additional species: *P. sulphurascens*, *P. lamaensis* and *P. pini*, as  
150 well as two more isolates (A42 and 718-S1) of *P. noxius*. The three assemblies of *P.*  
151 *noxius* have N50s of 2.4-2.7 Mb, whilst the other three genome assemblies comprise  
152 30.7-53.3 Mb with N50 of 570 kb-2.7 Mb. Together, the genome assembly quality of  
153 these Hymenochaetaceae are among the most contiguous and complete of the  
154 sequenced basidiomycetes.

155

156 A total of 9,833-18,103 genes were predicted in each species, which are 82-94%  
157 complete as assessed with the BUSCO[25] Basidiomycota dataset (Supplementary  
158 Table 1). To compare these predicted proteins to those of other basidiomycetes to  
159 explore chromosome and gene family evolutionary dynamics, we selected the  
160 proteomes of fifteen species from the 1000 Fungal Genomes Project that are highly  
161 finished or for use as outgroups (Supplementary Table 1). The Hymenochaetales  
162 species have median intergenic and intron lengths of 507-634 bp and 59-60 bp,  
163 respectively, which are comparable with those observed in genomes of other  
164 basidiomycetes. The maximum likelihood phylogeny based on 1,127 single-copy  
165 orthologs placed these species with *Fomitiporia mediterranea* and *Schizopora*  
166 *paradoxa*, two other species of the Hymenochaetaceae group with strong bootstrap  
167 support (**Figure 1e**). This phylogenetic relationship is consistent with previous  
168 findings[26], and species with similar genome sizes and pathogenic habit are grouped  
169 together. For instance, *Phellinus noxius* and *P. lamaensis* with compact genome sizes  
170 of ~31 Mb are grouped together, while the trunk rot pathogens *P. pini* and *F.*

171 *mediterranea* show an expansion of their genome sizes to 53-63 Mb and are also  
172 grouped together.

173

#### 174 **Analysis of transposable elements and evidence of repeat-induced point mutation** 175 **(RIP)**

176 A combination of *de novo* and reference repeat detection classified a total of 53-297  
177 repeat families (Supplementary Table 2). The transposable element (TE) content  
178 makes up 1.4-27.5% of the assemblies in the Hymenochaetales order (Supplementary  
179 Table 3) and is associated with their genome size and taxonomic relationship. The  
180 Class I transposons make up the majority of repetitive elements in these fungal  
181 genomes (Supplementary Table 3). Manual annotation of the 16 most abundant full-  
182 length transposon sequences revealed that these TEs belong to the *Gypsy* and *Copia*  
183 superfamilies of the LTR retrotransposons, and the *Tad1* clade from the LINE  
184 retrotransposons (Supplementary Figure 1). The *Gypsy* elements are 5,295 to 7,629 bp  
185 in length and contain an open reading frame encoding 1,523 amino acid residues,  
186 which contain conserved domains in the order of protease, reverse transcriptase,  
187 RNase H, integrase and chromodomain (Supplementary Figure 1). Chromodomain-  
188 containing *Gypsy* or chromoviruses are widely distributed in eukaryotes and present  
189 in many basidiomycetes[27]. In the case of *P. pini*, 588 full-length copies of two  
190 repeats from the *Gypsy* family (Supplementary Figure 1) make up 10% of the total  
191 assembly. In contrast, a clear exception is *P. sulphurascens* where a *Tad1* class LINE  
192 dominates the TE content of the genome and a *Copia* class of LTR-retrotransposon is  
193 found to be more abundant than *Gypsy*.

194

195 Copies of TEs are not distributed uniformly across the genome: the six complete  
196 chromosomes in the *P. noxius* assembly show clear signatures of Basidiomycete  
197 centromeres (located at the middle of chromosome and comprised solely of TEs) and  
198 enriched at subtelomeres; TEs are distributed as distinct 80.4-118.4 kb blocks (**Figure**  
199 **2**), which are typical in fungi[22]. These clusters also show a much lower average GC  
200 content suggesting a hallmark of fungal repeat-induced point mutation[28] (RIP)  
201 favouring T or A changes (Supplementary Figure 2). In Basidiomycota such  
202 mutational patterns were previously only observed in the Pucciniomycotina  
203 subphylum[29]. However, homologs of known genes responsible for RIP are present  
204 in all four Hymenochaetales species (Supplementary Table 4). Analysis of

205 dinucleotide transitions[30] has shown significantly higher CpN→TpN mutations, but  
206 not vice versa (Supplementary Figure 3), suggesting that RIP have successfully  
207 limited TE expansions especially in the compact genomes of *P. noxius* and *P.*  
208 *lamaensis*. Interestingly, each species has a different preferred mode of dinucleotide  
209 changes: CpA→TpA mutations clearly dominate in *P. noxius* compared to CpT→TpT  
210 and CpG→TpG in both *P. pini* and *P. sulphurascens*.

211

212

### 213 **Chromosome biology**

214 Like other complete chromosomes of basidiomycetes (Supplementary Table 1), the *P.*  
215 *noxius* genome also presents little variability in gene density along its scaffolds with  
216 the exception of TE clusters (Supplementary Figure 4). The number of known  
217 karyotypes in Basidiomycota ranges from 11 to 14 chromosome pairs (Supplementary  
218 Table 1), which suggests a possible ancestor with similar chromosome numbers. In an  
219 attempt to characterize chromosome architecture and evolution amongst the  
220 Agaricomycotina sub-division, we constructed a linkage network of seven selected  
221 species based on single-copy orthologs between species pairs. We identified 13  
222 distinct linkage groups (LG) providing strong evidence that chromosome macro-  
223 synteny is largely conserved since the common ancestor of Agaricomycetes (**Figure**  
224 **3a**; Supplementary Figure 5). Such a relationship is extended to Dacrymycetes where  
225 multiple scaffolds can be predominantly assigned to different linkage groups, but it is  
226 no longer apparent when compared to Tremellomycetes. Certain scaffolds are found  
227 to connect different linkage groups, implying inter-chromosomal rearrangements. For  
228 example, *P. noxius* scaffold1 is strongly clustered in LG11 but also shows linkage to  
229 LG10, implying a translocation from scaffold5 (**Figure 3**). Within each linkage group,  
230 gene collinearity is no longer apparent, suggesting high levels of intra-chromosomal  
231 rearrangements which have been observed in different fungal groups[31] (**Figure 3b**).

232

233 Like most species, the most common telomere repeating unit in basidiomycetes is  
234 TTAGGG[32], although other combinations such as T(n)AG(n)[33] or  
235 TTTAGGGG[34] have been described elsewhere. A systematic survey of the selected  
236 published genomes reveals the predominance of TTAGGG repeat across  
237 basidiomycetes, including *P. pini* and *P. sulphurascens* (Supplementary Table 5). The



238 karyotype of *P. noxius* has not been reported, but together with *P. lamaensis* we found  
239 10 scaffolds that end with overrepresented 13.6-66.9 copies of a TTAGGTG heptamer,  
240 suggesting a novel telomeric repeat compared to other basidiomycetes[32].  
241 Interestingly, the *Dacryopinax primogenitus* assembly contains 31 scaffold ends with  
242 TTAGGG telomeric repeats. Of those, 11 scaffolds have telomeric repeats at both  
243 ends revealing extensive fission of at least 21 chromosomes. **Figure 3b** shows one  
244 example of six scaffolds with such repeats present on the ends in *D. primogenitus*  
245 compared to two scaffolds in both *P. noxius* and *Coprinopsis cinerea*.

246

### 247 **Gene families associated with Hymenochaetales and *Phellinus noxius***

248 We sought to identify genes and protein domains specific to Hymenochaetales by  
249 determining when a new gene family arose and if the family has expanded or  
250 contracted. In total, 7,125-11,659 proteins in the Hymenochaetales order are clustered  
251 together in 5,184 families. Acquisition of gene families was mainly found at the tips  
252 of the phylogeny (531-8,055 families) suggesting each species has a repertoire of  
253 specific genes. The seven Hymenochaetaceae species have a total of 62 enriched  
254 protein domains compared to other basidiomycetes (Supplementary Figure 6). Gain of  
255 domains such as fungal specific transcription factors (Fungal\_trans; 53.8 vs 41.6  
256 copies) and peroxidase associated protein domains (Peroxidase\_ext; 16.7 vs 3.9  
257 copies) in these Hymenochaetaceae species reflect their white rot nature. Conversely,  
258 579 gene families were inferred to have been lost in the common ancestor of *P.*  
259 *lamaensis* and *P. noxius*. Analysis of gene ontology (GO) term enrichment on these  
260 otherwise preserved gene families in *P. sulphurascens* and *P. pini* revealed a common  
261 theme of intracellular signal transduction (Supplementary Table 6). Several signal  
262 transduction pathways may have become more specialized in the ancestor of *P. noxius*  
263 and *P. lamaensis*. For example, multiple copies of NmrA (nitrogen metabolite  
264 repression) were lost in these two species, which act as regulators in nitrogen-  
265 dependent control of secondary metabolism[35].

266

267 We sought to identify novel and expanded gene families in *P. noxius* despite its  
268 compact genome (Supplementary Figure 7). In total, 74% (7,313) of 9,833 predicted  
269 genes from *P. noxius* have orthologs from at least one of the other basidiomycetes,  
270 suggesting most of the basidiomycetous core genes are conserved. Consistent with the  
271 fact that *P. noxius* is a fast grower[5], genes encoding 1,3-beta-glucan synthase



272 responsible for the formation of beta-glucan components of the fungal cell wall[36]  
273 are expanded (14 compared to an average of 1.8 copies). Notably, counts of WD40  
274 protein domains are highest in *P. noxius* and *P. lamaensis* despite their small genome  
275 size (Supplementary Table 7a). This domain is important in protein-protein  
276 interactions of cellular networks and is usually associated with additional domains  
277 with other functional activities[37]. Interrogating this expansion revealed the  
278 association of WD40 domains with the AAA and NACHT domains (Supplementary  
279 Table 7b), both of which are NTPase domains and such combinations are commonly  
280 found in nucleotide-binding-oligomerization-domain like receptors (NLRs). This gene  
281 family is highly diverse in fungi and was found to be central to the process of  
282 programmed cell death and implicated in fungal vegetative incompatibility and  
283 general nonself recognition [38]. A maximum likelihood phylogeny of the NACHT  
284 domain proteins shows different expansions of NLR subfamilies in fungi  
285 (Supplementary Figure 8). In particular, the C2-NACHT-WD40(n) subfamily has  
286 only been found exclusively in a few basidiomycetes[39] and is present in the highest  
287 copy number in *P. noxius* and *P. lamaensis*. The strikingly high abundances of WD40  
288 domains in *P. noxius* and *P. lamaensis* are a result of tandem expansions near  
289 chromosome ends (**Figure 2**). Other expansions include UDP-  
290 glucuronosyltransferases, which catalyse conjugation reactions in the  
291 biotransformation of xenobiotics released by its host environment [40].

292  
293

#### 294 ***P. noxius* displays a bipolar heterothallic mating system**

295 Mate recognition of sexual reproduction in Basidiomycota is known to be controlled  
296 by two unlinked loci, named as *A* and *B* locus. Different from the divergently  
297 transcribed *HD1-HD2* observed in most species in Agaricomycetes[41], a conserved  
298 head-to-tail orientation of *HD1-HD2* in *HD* pair 1 was found in Hymenochaetales  
299 (**Figure 4**). Alignment of 100-kb sequences upstream and downstream of *A* locus in *P.*  
300 *noxius* isolates KPN91, 718-S1 and A42 revealed that *A* locus is highly polymorphic  
301 (*HD* pairs in particular) despite well-conserved flanking regions (Supplementary  
302 Figure 9). For *B* locus, only one *STE3* encoding seven transmembrane helices was  
303 identified; four pheromone genes were identified but not physically linked to the  
304 highly monomorphic *STE3* (Supplementary Figure 10, Supplementary Table 8,  
305 Supplementary Information), which is characteristic of a bipolar mating system.

306 To further confirm this observation, allele diversity was analyzed by resequencing *A*  
307 and *B* locus from 10 single-basidiospore isolates originating from a single basidiocarp  
308 (Supplementary Table 9). Sequencing of *STE3* revealed two highly similar alleles (b1,  
309 b2), with 99.5% amino acid identity. The only variant (244V/A) is considered a semi-  
310 conservative mutation (valine and alanine are nonpolar aliphatic acids) and may have  
311 minor or no effect on protein function. Previous studies have shown that although  
312 *STE3* is not involved in mating type determination in bipolar fungi, variations can  
313 still be observed[42-44]. Primer walking of *A* locus revealed two distinct haplotypes  
314 (Supplementary Figure 11): the a1 and a2 alleles of *HD* pair I shared an overall 78%  
315 nucleotide identity; the two alleles of *HD* pair II were highly diverse and the HD1  
316 domain in a2 allele contains a 1-bp and a 9-bp deletions and has become a  
317 pseudogene. The loss of HD1 domain was also found in the *HD* pair I of 718-S1  
318 (Figure 4), suggesting that at least one of the HD1 motifs in *A* locus is dispensable for  
319 a functional HD1-HD2 heterodimer in *P. noxius*. The presence or absence of specific  
320 HD domains reflects phylogenetic characteristics and has been commonly observed in  
321 fungi[45]. Clear segregation of two distinct alleles at *A* locus (Supplementary Figure  
322 11) suggests a heterothallic bipolar reproductive mode in *P. noxius*.

323

324 Distinct from all the other fungi, *P. noxius* has an exceptionally highly expanded *A*  
325 locus across a ~60-kb region (**Figure 4**). There are two pairs of HD1-HD2 gene  
326 located ~50-kb away from each other. The characteristic large interval between *HD*  
327 pairs has only been reported in *Schizophyllum commune* (~55 kb) and *Flammulina*  
328 *velutipes* (~70 kb), in which the genomic separation likely emerged through  
329 inversions or transpositions of gene clusters surrounding *HD*[46]. In the case of *P.*  
330 *noxius*, the large interval is a result of accumulation of genes transposed from  
331 different parts of the genome (**Figure 4**; Supplementary Figure 12).

332

333

### 334 **Distribution of CAZymes and secondary metabolic gene clusters**

335 Carbohydrate-active enzymes (CAZymes) are a diverse set of enzymes involved in  
336 the synthesis and degradation of carbohydrates[47]. Efficient degradation of lignin, a  
337 tough biopolymer present in woody plants, by white rot fungi such as members of  
338 Hymenochaetales requires an arsenal of ligninolytic enzymes[48]. Consistent with  
339 this, CAZymes spanning eight families of lignin-degrading enzymes (AA1-AA8)

340 which include laccases, peroxidases, oxidases, and reductases, and a lytic  
341 polysaccharide mono-oxygenase family (LPMO; AA9) were found in all  
342 Hymenochaetales species (Supplementary Table 10). Specialization includes the  
343 identification of copper-dependent LPMO AA11 and oxidoreductase from AA12  
344 family only in *P. lamaensis* and *P. sulphurascens*, respectively. The most abundant  
345 and diverse among the CAZymes annotated in these four species were glycoside  
346 hydrolases (GHs). GHs act on diverse carbohydrates, including cellulose (e.g. GH1,  
347 GH3, GH5, GH6, GH7 and GH12), hemicellulose (e.g. GH5, CE1, GH3 and GH27),  
348 pectin (e.g. GH28, GH43, GH78, CE8, CE12, PL1 and PL3), starch (GH13, GH15  
349 and GH31), and chitin (e.g. GH18, GH20, GT2 and CBM5) (Supplementary Table  
350 10). Despite its compact genome, *P. noxius* contains a comprehensive repertoire of  
351 carbohydrate-active enzymes; a total of 4.23% (416 proteins) of its proteome were  
352 identified as CAZymes which is more than those in the other Hymenochaetales  
353 (Supplementary Figure 13). Taken together, the diversity of the CAZymes encoded in  
354 the *P. noxius* genome is consistent with its ability to infect a wide range of hosts.

355

356 The Basidiomycota phylum is known for the production of huge and diverse sets of  
357 secondary metabolites (SM) such as terpenoid compounds which have roles in  
358 virulence, survival, and host specificity[49]. Investigations on SM gene clusters  
359 revealed that nonribosomal peptide synthase (NRPS), type 1 polyketide synthase  
360 (T1PKS), and terpene synthase (TS) clusters were common among the proteomes of  
361 Hymenochaetales. For *P. noxius*, a total of 18 putative clusters were found, which  
362 included one lantipeptide, one NRPS, two T1PKS, and 11 TS clusters. These SM  
363 clusters contained 4-37 annotated biosynthesis genes (Supplementary Table 11),  
364 distributed evenly in eight of the 12 scaffolds of *P. noxius* (**Figure 2**). Clusters of  
365 lantipeptides were found in only three out of 19 compared fungi, including *P. noxius*  
366 and its closest relative *P. lamaensis*. Lantipeptides are primarily known for their  
367 antimicrobial activities, although some have other roles such as in fungal  
368 morphogenesis<sup>19</sup>.

369

370

371

372

373

## 374 **Transcription profiles of *P. noxius* during infection of trees**

375 Upon infection of a tree, which usually starts from the root, the mycelial mat of *P.*  
376 *noxius* can grow and expand on the surface of the basal stems. Occasionally,  
377 basidiocarps were found in the diseased tree. To investigate genes and gene families  
378 that are likely to contribute to *in planta* colonization and the stress response of *P.*  
379 *noxius*, we characterized transcriptomes of mycelial mats between brown and creamy  
380 sections from two adjacent Chinese elm (*Ulmus parvifolia*) trees, fruiting body, and  
381 mycelia grown in potato dextrose agar (PDA) medium (2-3 biological replicates for  
382 each condition; Supplementary Figure 14a). Samples from naturally infected trees  
383 were used because artificial inoculation of *P. noxius* has remained challenging.  
384 Limited success has been achieved by wound inoculation of seedlings on the basal  
385 stem[14], but the infection site and symptom development did not fully reflect the  
386 phenomenon in nature. Global transcriptome profiles of *P. noxius* are grouped  
387 together according to conditions (Supplementary Figure 14b), which show a precise  
388 regulatory difference of *P. noxius* at different stages. In particular, 151 (58%)  
389 members of the most expanded gene family, NACHT- or WD40-encoding proteins,  
390 were found to be differentially expressed in at least one pairwise comparison of  
391 transcriptome profiles from different conditions (**Figure 5**). Of those, 10-35 genes  
392 were found upregulated solely in one condition, suggesting a major role of this gene  
393 family across multiple conditions. Other than the involvement in the incompatibility  
394 reaction[50], WD40-associated proteins have been found to be central to many  
395 developmental processes in ascomycetes, such as fruiting body formation in *Sordaria*  
396 *macrospora*[51] and the regulation of circadian clock in *Neurospora crassa*[52].  
397 Interestingly, we observed that the WD40 domain containing genes with similar  
398 transcriptional profile and domain combinations are physically clustered together,  
399 suggesting retained function on some of the paralogous genes since tandem  
400 duplication.

401

402 When compared with transcriptome profiles of *P. noxius* grown in PDA, Cytochrome  
403 P450, and CAZymes gene families dominated the list of genes upregulated in field  
404 samples (mycelial mat and fruiting body). For instance, despite lacking lignin-  
405 degrading peroxidases, *P. noxius* encodes 5, 2, and 11 copies of laccase, glyoxal  
406 oxidase, and manganese peroxidase genes with predicted signal peptides, respectively.  
407 Of these members of Auxiliary Activity (AA) family, 67% (12) are significantly

408 upregulated in mycelial mats. This is consistent with the fact that *P. noxius* as a white  
409 rot has the capacity for continuously degrading plant materials including lignin and  
410 responding to xenobiotics elicited by plant defence response[53] (Supplementary  
411 Table 12). Import pathways such as Major Facilitator Superfamily (MFS-1)  
412 transporters was *in silico* predicted to have a role in transporting intermediate  
413 decomposition products during wood decay [54]. This is also true for *P. noxius*,  
414 where 45% (51) out of 113 members of the MFS-1 transporter were upregulated in at  
415 least one of the field conditions. Only 10% of the *P. noxius* secretome were predicted  
416 to be putative effectors[55], which are significantly upregulated in *in planta*  
417 conditions (Supplementary Table 13). The upregulated gene list also contains  
418 hydrophobins (e.g. cerato-platanin), which contributed to virulence of various  
419 fungi[56] and were upregulated in previous inoculation experiments of *P.*  
420 *sulphurascens*[3].

421

422 The creamy and brown mycelial mat on infected trees are physically in close  
423 proximity and reflects relatively early and middle stages of pathogenesis rather than  
424 the late stage of vigorous decomposition. Their global transcriptome profiles were  
425 more similar to each other when compared with the other two conditions. Enrichment  
426 analysis of differentially expressed genes shows different strategies used by *P. noxius*  
427 (Supplementary Table 14): the creamy mycelium shows enrichment of upregulated  
428 genes involved in DNA replication such as ATPases and DNA topoisomerase,  
429 suggesting *P. noxius* is actively progressing outwards along the tree bark  
430 (Supplementary Figure 15). In contrast, members of P450 and CAZymes are  
431 significantly upregulated in the dark mycelial mat, suggesting an even higher  
432 expression of these genes during the middle stage of colonization.

433

434

### 435 **Sequence analysis of 60 *P. noxius* strains**

436 To further understand the regional dissemination of *P. noxius* in Taiwan and Japanese  
437 offshore islands, we sequenced the genomes of 60 isolates (Figure 6a) originating  
438 from diseased trees in urban cities as well as trails in natural parks. This collection  
439 was sequenced to a median depth of coverage of 35X, and additional mate pair  
440 libraries were sequenced in two isolates (718-S1 and A42) which were used to  
441 characterize synteny relationship amongst strains. An average of 96% mapping rate

442 was achieved after aligning reads from each strain to the KPN91 reference genome.  
443 The descriptions and statistics of the strains are provided in Supplementary Table 15.

444

445

#### 446 **Stable structural variation and frequencies of heterokaryons in *P. noxius***

447 The detection of frequency of heterokaryons and polyploids of *P. noxius* in nature  
448 remain challenging as its arthrospores contain 1-5 nuclei (based on quantification of  
449 145 arthrospores from A42 in this study) and multiple allelic fragments in SSRs (2-4  
450 alleles per locus) are commonly found in populations [4, 6]. All the strains were  
451 isolated from either a single arthrospore or fungal mat, and thus allowed for the  
452 analysis of variation in genome structure. We found no deviation in coverage across  
453 every scaffold in all strains (Supplementary Figure 16), suggesting a stable number of  
454 chromosome copies in *P. noxius*. To distinguish the frequency of mono- or  
455 heterokaryons in nature, heterozygous SNPs and minor allele frequency (MAF)  
456 distribution was inferred in each strain (Supplementary Figure 17). We identified four  
457 groups (A to D) that clearly differ in heterozygosity and MAF. The group with the  
458 lowest heterozygosity of averaging 0.2 % showed a random MAF distribution. In  
459 particular, strains 718-S1 and A42 each isolated from single basidiospores fall in this  
460 group suggesting they are monokaryotic in nature. Conversely, the other three groups  
461 have a much higher heterozygosity, with the highest group of 1.6% heterozygosity  
462 displaying a peak around 50% in MAF distribution. Peaks around 27%-33% are also  
463 observed in two of the groups, and this is not due to multiple nuclei as the  
464 distributions of the number of nuclei per cell in seven randomly selected isolates are  
465 the same (Supplementary Figure 18). Groups B-D may refer to different compositions  
466 of two or more genetically distinct nuclei. The number of monokaryons present in  
467 nature is 40% and can be found across all regions surveyed in this study.

468

469

#### 470 **Diversification of *P. noxius* across Pacific Ocean islands**

471 To examine the population structure of *P. noxius* in this area of Pacific Islands, we  
472 performed principal-component analysis (Figure 6b; Supplementary Figure 19) on the  
473 SNP variants from individual phased haploid genomes. Similar to previous report  
474 based on SSRs on highly diversified populations between Japanese offshore  
475 islands[4], the major principal component divided Ogasawara islands samples from



476 the rest of the samples, which are located geographically 1,210 km apart. The second  
477 and third principal components defined a tight cluster of Taiwanese isolates with  
478 considerable overlaps between cities despite being 170 km apart. Most isolates from  
479 Ryukyu islands can be differentiated from those from Taiwan. Interestingly, we  
480 identified three isolates from Taiwan that are distinctive from both the Taiwan-  
481 Ryukyu and Ogasawara island clusters, suggesting a possibility of more populations  
482 within the Taiwan island.

483

484 We constructed a maximum likelihood phylogeny based on 1,837,281 high  
485 confidence SNPs of *P. noxius* (Figure 6c). Concordant with the PCA, the strains from  
486 Ogasawara islands form a distinctive lineage. We also observed that the majority of  
487 Taiwan and Ryukyu islands strains are grouped together forming another major  
488 lineage, suggesting the possibility of gene flow in this region despite physical  
489 separations by the sea. We inferred the population structure in 144,426 unlinked  
490 biallelic sites using the Bayesian model-based clustering approach[57]. Consistent  
491 with the phylogeny, fastSTRUCTURE[57] also identified two Taiwan-Ryukyu and  
492 Ogasawara lineages circulating in this region (Figure 6c, Supplementary Figure 20).

493

494

#### 495 **High nucleotide diversities in *P. noxius* populations**

496 The *de novo* assemblies of three strains of *P. noxius* have on average 97% nucleotide  
497 identity and are largely co-linear to each other with apparent genome translocations  
498 between Taiwan/Ryukyu (A42 and KPN91) and the Ogasawara (718-S1) isolate  
499 (Supplementary Figure 21). We quantified sequence diversity using  $\theta_s$  and  $\theta_\pi$  and  
500 categorised them into whole genome average, four-fold synonymous sites and  
501 replacement sites (Table 1). An large number of SNPs are found in the genome of *P.*  
502 *noxius*, averaging one SNP identified in every 20-59 bp. Nucleotide diversity at  
503 synonymous sites  $\theta_\pi$ -syn is 15.8 and 19.2 per kilobase in Ogasawara island and  
504 Taiwan-Ryukyu populations, respectively. This is ~5 fold higher when compared to  
505 the majority of species[58] and is likely an underestimate of true diversity as indels  
506 were not considered. Extremely high diversity has been reported in natural  
507 populations of *Schizophyllum commune*[59]. The Tajima's D is strongly negative in  
508 the Taiwan and Ryukyu islands lineage, suggesting an excess of low frequency alleles  
509 present in the population possibly as a result of high mutation rate[59] or population



510 expansion. In the Ogasawara population, nucleotide diversity is reduced compared to  
511 the Taiwan/Ryukyu lineage and Tajima's D is positive implying a reduced effective  
512 population size; *P. noxius* may have been introduced recently in these islands. By *de*  
513 *novo* assembly and annotation of these isolates, we were able to identify a total of 25  
514 differential content of Pfam domains between these two lineages ( $P \leq 0.05$ ; Wilcoxon  
515 rank-sum test; Supplementary Figure 22). Of them, Arv1 can be found in 37/51  
516 strains in Taiwan-Ryukyu lineage which may be related to the traffic of sterol[60].  
517 Together our data suggest that the two *P. noxius* lineages may have derived from  
518 genetically distinct gene pools and have undergone divergent evolutionary scenarios,  
519 possibly as a result of different time of introduction, and different environments  
520 and/or human interference in Taiwan-Ryukyu vs Ogasawara areas.

521

522

## 523 **DISCUSSION**

524

525 Here we report four high-quality genome sequence of Hymenochaetales species that  
526 are global tree pathogens of particular importance. Orthologous relationships with  
527 other complete genomes of basidiomycetes have confirmed conservation of  
528 karyotypes with few fusion or breaks in Agaricomycetes. Our study has shown how a  
529 pathogenic wood decay fungus regulates global transcription at different stages of  
530 colonization on tree host in nature. Such orchestrated responses have been  
531 demonstrated in a few other white rot fungi, including *Pycnoporus coccineus* during  
532 cultivation in three types of lignocellulosic substrates (i.e. cereal straw, softwood, and  
533 hardwood)[55], and *Heterobasidion irregular* during growth in wood substrates, in  
534 the cambial zone of pine, and as fruiting bodies[22]. Although the initial phase for *P.*  
535 *noxius* to invade the root of a living tree remains to be elucidated, our combined  
536 genome and transcriptome analysis reiterate the importance of CAZymes and P450  
537 families in host adaptation, the involvement of MFS-1 in transporting the intermediate  
538 decomposition products, and the roles of abundant WD40-encoding proteins in  
539 modulating cell differentiation and responses to environmental stimuli. The results  
540 can serve as a starting point for understanding the survival strategies of *P. noxius*,  
541 from which new control methods could be developed.

542

543 Population genomics analyses of *P. noxius* suggest that it is a hypervariable species.  
544 Our investigations into mating type loci and genome-wide heterozygosity further  
545 indicated that the genetic hyperdiversity can be attributed to a bipolar heterothallic  
546 reproductive system and heterokaryotic nature, though gene flow and/or high  
547 mutation rate may also play some roles. The exceptional large separation between *HD*  
548 pairs would allow higher probability of recombination between the physically distant  
549 *HD* genes[41, 46], thus resulting in progeny with more diverse mating types which  
550 are ready to mate. Notably, both monokaryotic and heterokaryotic state of *P. noxius*  
551 mycelia are prevalent in the nature, and some isolates likely contained more than two  
552 genetically different nuclei[6]. In addition, some isolates were able to produce  
553 basidiocarps by themselves when cultured on sawdust medium (P.-J. Ann, pers.  
554 comm.), suggesting dikaryotization or homokaryotic fruiting occurred spontaneously  
555 or in response to certain conditions[63]. It would be interesting to further investigate  
556 the complex regulatory mechanisms underlying anastomosis, karyogamy, and meiotic  
557 division during vegetative growth and basidiocarp formation. Transcriptional  
558 diversity among genetically variable individuals is also warrant further exploration.

559

560 How *P. noxius* is spread in regions of Asia has been the focus of a few studies[4, 6,  
561 64]. Field observations support the root-to-root spread as a major mode of  
562 transmission. Human activity such as planting of infected seedlings may have  
563 promoted the movement of the strains between the islands of Taiwan and the Ryukyu  
564 region, which provide an artificial environment for population to increase. The  
565 within-population hyperdiversity and sporadic pattern of new disease foci also  
566 support the involvement of basidiospores in *P. noxius* dissemination. Abundant  
567 basidiospores produced from perennial fruiting bodies may have the ability to travel  
568 long distance (e.g. the basidiospores of *Heterobasidion annosum* and *Peniophora*  
569 *aurantiaca* were captured 50–500 km and ~1000 km apart from the inoculum source).  
570 Following the dispersal, highly variable individuals of *P. noxius* would have good  
571 chance of successful colonization. A preliminary model based on 19 bioclimatic  
572 variables of known locations of ~100 *P. noxius* isolates from south eastern Asia,  
573 Australia, and Pacific islands predicted that extensive global regions are at risk, which  
574 includes a big part of the South American continent[65].

575

576

577 **CONCLUSION**

578

579 The Hymenochaetales is phylogenetically placed between the better-studied  
580 Agaricales and Ustilaginales orders, making the reference assembly of *P. noxius*  
581 KPN91 an attractive genome to study the evolutionary transition between these orders  
582 of Basidiomycota. It should be of continuous interest to confirm this observation  
583 when more reference genome assemblies become available. Genetic hyperdiversity of  
584 *P. noxius* suggests that the pathogen may have greater adaptability to different  
585 environments and stresses. Much more attention has to be paid on how global  
586 warming and increasing frequency of extreme weather events would enhance disease  
587 severity and allow the colonization of a fast grower like *P. noxius* in the warm  
588 temperate zones.

589

590

591

592

593

594

595

596

597

598

599

600

601

602

603

604

605

606

607

608

609

610

611 **FIGURES AND TABLES**

612

613 **Figure 1. Life stages of *Phellinus noxius* and comparative genomic analysis of**  
614 **Hymenochaetales species. (a)** The mycelial mat with young creamy leading front  
615 and aged brown section. **(b)** In advanced stage of decay, the hyphae form a network  
616 of brown zone lines permeating the soft and white wood tissue. (Lower left and lower  
617 right) **(c and d)** Basidiocarps are perennial and can be resupinate **(c)** or grow into a  
618 sessile bracket-like conk with a broad basal attachment **(d)**. The distinctive greyish-  
619 brown surface is the hymenial layer with irregularly polygonal pores, containing four-  
620 spored basidia, ellipsoid and hyaline basidiospores, but no hymenial setae. **(e)** The  
621 phylogeny of four *Phellinus* species with 15 other species of Basidiomycota based on  
622 a concatenated alignment of single-copy orthologous genes. All nodes have 100 out of  
623 100 bootstrap replicates. The numbers of gained (“+”) and lost (“-”) gene families  
624 along each branch of the phylogeny is annotated.

625

626 **Figure 2. The twelve assembled scaffolds of *Phellinus noxius* with telomeres**  
627 **(denoted as T).** The plot shows the distribution and density of LTR retrotransposons  
628 and various gene families of interest denoted in different colours.

629

630 **Figure 3. Linkage group (LG) network of Basidiomycota. (a)** The linkage groups  
631 were identified by linking single-copy orthologs of scaffolds between species pairs.  
632 All scaffolds included in this plot are larger than 500kb. Each directional edge points  
633 toward the reference chromosome. Edges were weighted by the number of single-  
634 copy orthologs, and an edge was filtered if it has a weight smaller than 20 or less than  
635 40% of the sum of all weights out of a node. **(b)** Cross-mapping of single-copy  
636 orthologs in LG10 and 11. Scaffold names are shown at the upper-right side of each  
637 sequence, with detectable telomeric regions labelled as ‘T’ at the upper-left side.

638

639 **Figure 4. Synteny around the *A* mating locus.** The analysis included *Phellinus*  
640 *noxius*, *Porodaedalea pini*, *Phellinus sulphurascens*, *Phellinus lamaensis*, two other  
641 species from Hymenochaetales species (*Fomitiporia mediterranea*, *Schizopora*  
642 *paradoxa*), two species from Agaricales (*Laccaria bicolor*, *Coprinopsis cinerea*),  
643 *Sistotremastrum niveocreameum*, and *Ustilago maydis*.

644

645 **Figure 5. WD40 domain containing genes upregulated in the transcriptome of**  
646 ***Phellinus noxius* at different conditions.** RNA-seq counts of these genes (in log of  
647 FPM, fragments per million) for *P. noxius* cultured in PDA, as mycelial mat and  
648 fruiting body on infected trees are presented as different colours in a heatmap sorted  
649 according to their physical positions on the assembly. The results of differentially  
650 expressed genes from pairwise DEseq2 comparisons ( $p_{adj} < 0.01$ ) are shown in  
651 different colours each corresponding to a specific life stage of *P. noxius*. Different  
652 combinations of protein domains are categorised based on their initial domain from  
653 the N termini. Genes with combination that is shared no more than four other genes  
654 are categorised into ‘Others’ (3 of ANAPC4, 1 of BOP1NT, 1 of CAF1C\_H4-bd, 5 of  
655 Pkinase, 1 of PRP4, 1 of Striatin, 1 of Tup\_N).

656

657 **Figure 6. The population genomics of 60 *Phellinus noxius* isolates.** (a) Map of  
658 Taiwan and offshore islands of Japan showing origins of the 60 sampled *P. noxius*  
659 isolates. Ogasawara islands were conveniently drawn below Ryukyu island so this  
660 does not represent their actual location. (b) PCA plot of 60 *P. noxius* isolates using  
661 genome-wide variation data sampled from 13 islands by the first three eigenvectors.  
662 (c) Top: Phylogenetic tree with 100 bootstrap using SNPs computed from alignment  
663 to KPN91 reference. Point separating the Taiwan-Ryukyu and Ogasawara island  
664 isolates was used as root. Nodes with  $>90\%$  bootstrap were labelled with circles.  
665 Bottom: fastSTRUCTURE analysis of the linkage independent pruned set of variation  
666 data. A model with two ancestral components ( $K=2$ ) had the highest likelihood to  
667 explain the variation of genome-wide structure on the 60 isolates. Also see  
668 Supplementary Figure 20 for different K.

669

670 **Table 1.** Polymorphism in the two regional lineages of *Phellinus noxius*.

671

672

673

674

675

676

677

678

679 **METHODS**

680

681 **Strain preparation and sequencing**

682 Genome sequencing of three *Phellinus* species and *P. pini* (Supplementary  
683 Information) was performed using both Pacific Biosciences (*P. noxius*, *P. lamaensis*,  
684 *P. sulphurascens* and *P. pini*) and Illumina (*P. noxius*) platforms. DNA was isolated  
685 using the CTAB method[6]. At least 15 µg DNA was used for a 20 kb library prep  
686 according to the manufacturer's instructions. Sequencing was performed on a Pacific  
687 Biosciences RS II system using 8 SMRT cell per run, P6C4 chemistry and 360 min  
688 movie time. A total of 5-7 SMRT cells were run per species yielding a raw depth of  
689 coverage of 173-266X. Illumina shotgun genomic libraries were sheared by Covaris  
690 and genomic libraries prepared using TruSeq DNA LT Sample Prep Kit (Illumina).  
691 Input of 1 µg sheared DNA was used for end-repair, A-tailing, adaptor ligation, and  
692 gel size selection. Size range at 600-700bps range was selected from gel and  
693 amplified by 5 cycles of PCR. In addition, Illumina mate-pair libraries were generated  
694 using 8 µg of genomic DNA with gel size selection of tagmented DNA at 2-4kb, 4-  
695 7kb, 7-10kb, and 10-20kb, and amplified by 10~15 cycles of PCR. These libraries  
696 were normalized by KAPA Library Quantification Kit (KAPA Biosystems), and  
697 pooled equally for PE2\*300 sequencing on MiSeq V2 sequencer.

698

699 To aid annotation for each of the species in this study, 7- to 21-day old mycelia from  
700 PDA cultures were used for RNA-seq. For field samples, *Phellinus noxius* mycelial  
701 mat on creamy and dark region of two Chinese elm trees (*Ulmus parvifolia*) adjacent  
702 to each other in Academia Sinica, Taiwan were scraped down using alcohol wiped  
703 tweezers. The fruiting body of *Phellinus noxius* was found on *Machilus kobu* trees,  
704 Ogasawara island, Japan and was removed aseptically. On diseased trees, dried (and  
705 possibly dead) mycelial mats are most commonly observed. Fresh mycelial mat and  
706 fruiting body only occasionally occur and we were not able to collect both samples  
707 from the same tree. RNA was isolated with Direct-zol (Zymoresearch) according to  
708 manufacturer's instructions. RNA-seq libraries were constructed using the Illumina  
709 TruSeq Stranded mRNA HT Sample Prep Kit with the dual index barcoded adaptors.  
710 Input of 3 µg of total RNA was used for each sample for two rounds of oligo-dT bead  
711 enrichment, and the ligated cDNA were amplified by 10 cycles of PCR. The Stranded  
712 mRNA libraries were quantified by Qubit and molar concentrations normalized

713 against the KAPA Library Quantification Kit (KAPA Biosystems) for Illumina  
714 platform. The transcriptome libraries were pooled at equal molar concentrations, and  
715 PE2\*151nt multiplexed sequencing was conducted on HiSeq 2500 sequencer.

716

### 717 **Nuclear quantification**

718 Nuclei in the growing hyphal tips were stained following the procedure described by  
719 Chung et al. (2015). The mycelium on the slide was mounted in 20 µl of a DAPI (4',6-  
720 diamidino-2-phenylindole) solution (10 µg/ml in ddH<sub>2</sub>O) for an hour, destained in  
721 ddH<sub>2</sub>O for 30 min, then observed under a OLYMPUS BX41 microscope (Shinjuku-  
722 ku, Tokyo, Japan) equipped with filter cube U-MWU2 (BP 330–385 nm, LP 420 nm).  
723 Images were captured by using a Canon (Ohta-ku, Tokyo, Japan) digital camera EOS  
724 700D. One hundred hyphal cells per strain were counted.

725

### 726 **Genome assembly**

727 Genome assembly of different species was carried out with Falcon[66] (ver 0.5.0) and  
728 were improved using Quiver[67] and finisherSC[68]. For assembly of individual  
729 strains of *P. noxius*, Illumina paired end reads were trimmed with Trimmomatic[69]  
730 (ver 0.32; options LEADING:30 TRAILING:30 SLIDINGWINDOW:4:30  
731 MINLEN:50) and subsequently assembled using SPAdes[70] (ver 3.7.1). Multiple  
732 mate-pair reads were available for three strains of *P. noxius* (KPN91, A42 and 718-S1)  
733 and they were assembled using ALLPATH-LG[71] assembler (ver 49688) and  
734 improved using Pilon[72]. The *P. noxius* assembly was further merged with  
735 metassembler[73], miss-assemblies were identified using REAPR[74] and manually  
736 corrected.

737

### 738 **Gene predictions and functional annotation**

739 For *P. noxius*, the gene predictor Augustus[75] (v 3.2.1) was trained on a gene  
740 training set of complete core genes from CEGMA[76] and subsequently used for  
741 manual curation of ~1000 genes. Annotation was then run by providing introns as  
742 evidence from RNA-seq data. For *P. lamaensis*, *P. sulphurascens* and *P. pini*, genes  
743 were predicted using Braker1[77] pipeline that automatically use RNA-seq mappings  
744 as evidence hints and retraining of GeneMark-ES[78] and Augustus. Gene product  
745 description was assigned using blast2go[79] (ver 4.0.7) and GO term assignment were  
746 provided by ARGOT2.5[80]. The web server dbCAN[81] (HMMs 5.0, last accessed



747 September 5 2016) was used to predict CAZymes from the protein sequences of all  
748 species, while AntiSMASH[82] (version 3.0) was used to predict secondary  
749 metabolite gene clusters. For dbCAN results, only hits with  $\leq 1 \times 10^{-5}$  e-value, and  
750  $\geq 30\%$  HMM coverage were considered, while overlapping domains were resolved  
751 by choosing hits with the smallest *P* value.

752

### 753 **Repeat analysis and repeat induced mutation analysis**

754 Consensus sequences of repetitive elements in the assembly of the four  
755 Hymenochaetales species were identified based on UCLUST[83] clustering of 80%  
756 sequence identity from two repeat detection programs: RepeatModeler  
757 ([www.repeatmasker.org](http://www.repeatmasker.org)) and TransposonPSI (<http://transposonpsi.sourceforge.net/>).  
758 Annotations of these sequences were based on output of both programs and BLAST  
759 results from the National Center for Biotechnology Information (NCBI) nonredundant  
760 database. RepeatMasker (v3.2.8, <http://www.repeatmasker.org>) was used to calculate  
761 the distribution of each repeat and its abundance. Consensus sequences of the most  
762 abundant copy were manually curated based on pfam[84] (ver 30.0) domain  
763 prediction from the longest open reading frame. Whenever a LTR retrotransposon  
764 was identified, long terminal repeats (LTR) and associated features were predicted  
765 using LTRharvest[85]. Repeat induced mutation (RIP) analysis was carried out using  
766 RIPCAL[30]

767

### 768 **Comparative genomics analysis**

769 Gene families were determined by OrthoFinder[86] (ver 1.0.6). Then, MAFFT[87]  
770 (ver 7.271) was then used to align sequences in each of 1,127 single-copy orthogroups.  
771 Alignments results with less than 10% alignment gaps were concatenated, and the  
772 outcome was taken to compute a maximum likelihood phylogeny using RAxML[88]  
773 with 100 bootstrap replicates. Gene family gain and loss in different positions along  
774 the global phylogeny leading to *P. noxius* were inferred using dollop[89]. Pfam and  
775 GO enrichments were carried out on these gene families using TopGO[90] (ver  
776 2.10.0). Sequences to be included in the phylogenetic tree for NACHT domain  
777 containing genes were selected on the basis of the presence of pfam domain PF05729.

778

779

780

## 781 **RNA-seq analysis of *P. noxius* at different conditions**

782 For differential gene expression analysis, paired-end Illumina RNA-seq data were  
783 mapped against *P. noxius* genome using STAR[91] and number of read counts per  
784 gene were determined with featureCounts[92] (ver 1.5.0-p1). DESeq2[93] was used to  
785 determine the reliability of our replicates and determine differentially expressed genes  
786 between conditions. Pairwise comparison of each transcript is identified as  
787 differentially expressed if adjusted p-value is lower than 0.01 and the absolute value  
788 of log<sub>2</sub>(fold change) is greater than 1. GO term enrichment of up- and down-regulated  
789 genes between conditions was carried out with Goseq[94].

790

## 791 **MAT locus**

792 Homologs of the conserved genes in mating locus *A* and *B* were annotated in *P.*  
793 *noxius*, *P. pini*, *P. sulphurascens* and *P. lamaensis* (e-value < 10<sup>-5</sup>) then subjected to  
794 InterProScan 5[95] (ver 5.20-59.0) and Pfam[84] (ver 30.0) for protein signature  
795 prediction. Syntenic alignment of *A* locus among *Phellinus* spp. and other species  
796 (sequences/annotations retrieved from Joint Genome Institute MycoCosm[96]) was  
797 plotted using genoPlotR package[97] in R. The sequences of *A* locus in KPN91, 718-  
798 S1 and A42 were further compared by MUMmer[98] (ver 3.20) and PipMaker[99]  
799 (<http://pipmaker.bx.psu.edu/cgi-bin/pipmaker?basic>). For identification of candidate  
800 pheromone genes, all the potential open reading frames were filtered for small  
801 peptides with C-terminal CaaX motif, then searched for pheromone homologies  
802 against Pfam-A and scanned for farnesylation signal by PrePs[100]  
803 (<http://mendel.imp.ac.at/PrePS/>).

804

805 The sequences of *HD* and *STE3* genes were analyzed for 10 single-basidiospore  
806 isolates originating from a basidiocarp by the dideoxy termination method (primers  
807 listed in Supplementary Table 16). Long-range PCR followed by primer walking was  
808 performed to sequence the highly diverse regions containing *HD1-HD2* in *A* locus.  
809 The outer primers were designed manually based on the alignment of all the isolates;  
810 the inner primers were developed step by step according to previous sequencing  
811 results. The PCR reaction was performed in 30- $\mu$ l reaction mixture containing 50 to  
812 100 ng genomic DNA, 0.2 mM dNTP, 1X Ex Taq buffer [proprietary, containing  
813 20mM Mg<sup>2+</sup>] (Takara Bio Inc., Japan), 0.67  $\mu$ M forward and reverse primers, and  
814 TaKaRa Ex Taq® DNA polymerase (Takara Bio Inc., Japan). The thermal cycling

815 parameters were 1 cycle of 95°C for 3 min, 30 cycles of 95°C for 30 s, 54°C for 30 s,  
816 and 72°C for 60–270 s (according to different product sizes, ~2 kb/min), and a final  
817 extension step of 72°C for 10 min. The PCR products were sequenced by Genomics  
818 Biotechnology Inc. (Taipei, Taiwan). DNA trace data were visualized using 4Peaks  
819 (<http://nucleobytes.com/4peaks>) and assembled using DNA Sequence Assembler in  
820 DNA Baser (<http://www.dnabaser.com>).

821

## 822 **Population genomics**

823 Paired end reads of 60 *P. noxius* strains were aligned to the KPN91 reference using  
824 Smalt v5.7 ([www.sanger.ac.uk/resources/software/smalt/](http://www.sanger.ac.uk/resources/software/smalt/)). Removal of PCR  
825 duplicates and bam file sorting were implemented with Picard  
826 (<http://broadinstitute.github.io/picard/>) and samtools[101] (ver 1.3-20-gd49c73b). The  
827 first round of variant identification was implemented in Variscan[102] (v.2.4.0) and  
828 degree of heterokaryon was inferred in each strain based on allele frequency and total  
829 number of heterozygous SNPs called. The final list of SNPs was ascertained by  
830 combining evidences from samtools[101] and FreeBayes[103] (ver1.0.2-16-  
831 gd466dde). A maximum likelihood phylogeny of the SNPs segregating in these 60  
832 strains was produced using FastTree[104]. plink[105] (v1.9) was used to subset  
833 biallelic SNPs without linkage (filtering options: --maf 0.05 --indep-pairwise 50 5  
834 0.2), which were clustered using fastSTRUCTURE[57] to determine number of  
835 populations. Strains were phased using samtools[101] and one haplotype was chosen  
836 at random. Consensus sequences were generated from each strain using bcftools[106]  
837 and population genetics analyses were conducted using Variscan[107].

838

839

840

841

842

843

844

845

846

847

848

849 **DECLARATIONS**

850 **Ethics approval, consent to participate and consent for publication:**

851 Not applicable in this study.

852

853 **Availability of data and material:**

854 Genome assemblies and annotations are available from NCBI under whole genome  
855 shotgun (WGS) ID: NBII000000000 (*P. noxius*), NBBA000000000 (*P. sulphurascens*),  
856 NBAY000000000 (*P. pini*) and NBAZ000000000 (*P. lamaensis*). Bioproject and  
857 Biosample ID of raw data are available in Supplementary Table 15, 17 and 18.

858

859 **Competing interests:**

860 The authors declare that they have no competing interests.

861

862 **Funding:**

863 I.J.T. and J.T.L were funded by MOST (105-2628-B-001-002-MY3 and 105-2313-B-  
864 001 -003). C.L.C. was funded by Office of General Affairs, National Taiwan  
865 University.

866

867 **Author's contributions:**

868 Strain cultivation and preparation: H.H.L., J.T.L, H.M.K, M.A., T.H., Y.O., N.S. and  
869 T.K. Strain provider: C.L.C., R.F.L., S.S.T., P.J.A., J.N.T., M.A., T.H., Y.O., N.S.  
870 Strain sequencing and assembly: C.L.C., H.H.L., C.Y.C., M.J.L., T.K. and I.J.T.

871 Annotation and manual curation: H.M.K., J.T.L. and I.J.T. Comparative genomics  
872 analysis: T.H.K., D.L., M.B.R., H.M.K. and I.J.T. Population genomics analysis:  
873 H.M.K., J.T.L. and I.J.T. Mating locus analysis: C.L.C., H.H.L., Y.Y.C., T.H.K., I.J.T.  
874 RNA-seq analysis: J.T.L and I.J.T. Wrote the manuscript: C.L.C, J.T.L, H.H.L, T.K  
875 and I.J.T. Conceived and directed the project: C.L.C., T.K. and I.J.T.

876

877 **Acknowledgements:**

878 We thank Yen-Ping Hsueh (IMB, Academia Sinica) and Robert Waterhouse  
879 (University of Lausanne) for commenting the manuscript. We thank Chian-mei Wei,  
880 Kuan-chun Chen (High Throughput Genomics Core at Biodiversity Research Center,  
881 Academia Sinica) for sequencing. We thank Tun-Tschu Chang and Yu-Ching Huang  
882 for strain collection and consultation.

883 REFERENCES

884

- 885 1. Gross A, Holdenrieder O, Pautasso M, Queloz V, Sieber TN:  
886 **Hymenoscyphus pseudoalbidus, the causal agent of European ash dieback.**  
887 *Mol Plant Pathol* 2014, **15**:5-21.
- 888 2. Potter C, Harwood T, Knight J, Tomlinson I: **Learning from history,**  
889 **predicting the future: the UK Dutch elm disease outbreak in relation to**  
890 **contemporary tree disease threats.** *Philos Trans R Soc Lond B Biol Sci* 2011,  
891 **366**:1966-1974.
- 892 3. Williams HL, Sturrock RN, Islam MA, Hammett C, Ekramoddoullah AK,  
893 Leal I: **Gene expression profiling of candidate virulence factors in the**  
894 **laminated root rot pathogen *Phellinus sulphurascens*.** *BMC Genomics*  
895 2014, **15**:603.
- 896 4. Akiba M, Ota Y, Tsai IJ, Hattori T, Sahashi N, Kikuchi T: **Genetic**  
897 **Differentiation and Spatial Structure of *Phellinus noxius*, the Causal**  
898 **Agent of Brown Root Rot of Woody Plants in Japan.** *Plos One* 2015,  
899 **10**:e0141792.
- 900 5. Ann P, Chang T, Ko W: ***Phellinus noxius* Brown Root Rot of Fruit and**  
901 **Ornamental Trees in Taiwan.** *Plant disease* 2002, **86**.
- 902 6. Chung C-L, Huang S-Y, Huang Y-C, Tzean S-S, Ann P-J, Tsai J-N, Yang C-C,  
903 Lee H-H, Huang T-W, Huang H-Y, et al: **The Genetic Structure of *Phellinus***  
904 ***noxius* and Dissemination Pattern of Brown Root Rot Disease in Taiwan.**  
905 *Plos One* 2015, **10**:e0139445.
- 906 7. Goberville E, Hautekeete NC, Kirby RR, Piquot Y, Luczak C, Beaugrand G:  
907 **Climate change and the ash dieback crisis.** *Sci Rep* 2016, **6**:35303.
- 908 8. Fisher MC, Henk DA, Briggs CJ, Brownstein JS, Madoff LC, McCraw SL,  
909 Gurr SJ: **Emerging fungal threats to animal, plant and ecosystem health.**  
910 *Nature* 2012, **484**:186-194.
- 911 9. Cunniffe NJ, Cobb RC, Meentemeyer RK, Rizzo DM, Gilligan CA: **Modeling**  
912 **when, where, and how to manage a forest epidemic, motivated by sudden**  
913 **oak death in California.** *Proc Natl Acad Sci U S A* 2016, **113**:5640-5645.
- 914 10. H HG: *Diseases of forest and shade trees of the United States.* U.S. Dept. Of  
915 Agriculture Forest Service Handbook Number 386; 1971.
- 916 11. Sahashi N, Akiba M, Ishihara M, Ota Y, Kanzaki N: **Brown root rot of trees**  
917 **caused by *Phellinus noxius* in the Ryukyu Islands, subtropical areas of**  
918 **Japan.** *Forest Pathology* 2012, **42**:353-361.
- 919 12. Sahashi N, Akiba M, Takemoto S, Yokoi T, Ota Y, Kanzaki N: ***Phellinus***  
920 ***noxius* causes brown root rot on four important conifer species in Japan.**  
921 *European Journal of Plant Pathology* 2014, **140**:869--873.
- 922 13. Ann P-J, Chang T-T, Ko W-H: ***Phellinus noxius* brown root rot of fruit and**  
923 **ornamental trees in Taiwan.** *Plant Disease* 2002, **86**:820--826.
- 924 14. Ann PJ, Lee HL, Huang TC: **Brown Root Rot of 10 Species of Fruit Trees**  
925 **Caused by *Phellinus noxius* in Taiwan.** *Plant Disease* 1999, **83**:746-750.
- 926 15. Sahashi N, Akiba M, Ishihara M, Miyazaki K, Kanzaki N: **Cross Inoculation**  
927 **Tests with *Phellinus noxius* Isolates from Nine Different Host Plants in**  
928 **the Ryukyu Islands, Southwestern Japan.** *Plant Disease* 2010, **94**:358--360.
- 929 16. Nandris D, Nicole M, Geiger JP: **Variation in virulence among *Rigidoporus***  
930 ***lignosus* and *Phellinus noxius* isolates from West Africa1.** *European*  
931 *Journal of Forest Pathology* 1987, **17**:271-281.

- 932 17. Chang T-T: **Decline of some forest trees associated with brown root rot**  
933 **caused by *Phellinus noxius***. *Plant Pathology Bulletin* 1992, **1**:90-95.
- 934 18. Schwarze F, Jauss F, Spencer C, Hallam C, Schubert M: **Evaluation of an**  
935 **antagonistic *Trichoderma* strain for reducing the rate of wood**  
936 **decomposition by the white rot fungus *Phellinus noxius***. *Biological Control*  
937 2012, **61**:160--168.
- 938 19. Wu J, Peng SL, Zhao HB, Tang MH, Li FR, Chen BM: **Selection of species**  
939 **resistant to the wood rot fungus *Phellinus noxius***. *European Journal of*  
940 *Plant Pathology* 2011, **130**:463-467.
- 941 20. Huang H, Sun L, Bi K, Zhong G, Hu M: **The effect of phenazine-1-**  
942 **carboxylic acid on the morphological, physiological, and molecular**  
943 **characteristics of *Phellinus noxius***. *Molecules* 2016, **21**:613.
- 944 21. Zhou L-W, Vlasák J, Dai Y-C: **Taxonomy and phylogeny of *Phellinidium***  
945 **(Hymenochaetales, Basidiomycota): A redefinition and the segregation of**  
946 ***Coniferiporia* gen. nov. for forest pathogens**. *Fungal Biology* 2016,  
947 **120**:988-1001.
- 948 22. Stajich JE, Wilke SK, Ahren D, Au CH, Birren BW, Borodovsky M, Burns C,  
949 Canback B, Casselton LA, Cheng CK, et al: **Insights into evolution of**  
950 **multicellular fungi from the assembled chromosomes of the mushroom**  
951 ***Coprinopsis cinerea* (*Coprinus cinereus*)**. *Proceedings of the National*  
952 *Academy of Sciences* 2010, **107**:11889-11894.
- 953 23. Alfaro M, Castanera R, Lavín JL, Grigoriev IV, Oguiza JA, Ramírez L,  
954 Pisabarro AG: **Comparative and transcriptional analysis of the predicted**  
955 **secretome in the lignocellulose-degrading basidiomycete fungus *Pleurotus***  
956 ***ostreatus***. *Environmental Microbiology* 2016, **18**:4710-4726.
- 957 24. Foulongne-Oriol M, Rocha de Brito M, Cabannes D, Clément A, Spataro C,  
958 Moinard M, Dias ES, Callac P, Savoie J-M: **The Genetic Linkage Map of**  
959 **the Medicinal Mushroom *Agaricus subrufescens* Reveals Highly**  
960 **Conserved Macrosynteny with the Congeneric Species *Agaricus bisporus***.  
961 *G3&#58; Genes|Genomes|Genetics* 2016, **6**:1217-1226.
- 962 25. Simão FA, Waterhouse RM, Ioannidis P, Kriventseva EV, Zdobnov EM:  
963 **BUSCO: assessing genome assembly and annotation completeness with**  
964 **single-copy orthologs**. *Bioinformatics* 2015, **31**:3210-3212.
- 965 26. Larsson K-H, Parmasto E, Fischer M, Langer E, Nakasone KK, Redhead Sa:  
966 **Hymenochaetales: a molecular phylogeny for the hymenochaetoid clade**.  
967 *Mycologia* 2006, **98**:926-936.
- 968 27. Castanera R, Borgognone A, Pisabarro AG, Ramirez L: **Biology, dynamics,**  
969 **and applications of transposable elements in basidiomycete fungi**. *Appl*  
970 *Microbiol Biotechnol* 2017, **101**:1337-1350.
- 971 28. Selker EU: **Premeiotic instability of repeated sequences in *Neurospora***  
972 ***crassa***. *Annu Rev Genet* 1990, **24**:579-613.
- 973 29. Horns F, Petit E, Yockteng R, Hood ME: **Patterns of Repeat-Induced Point**  
974 **Mutation in Transposable Elements of Basidiomycete Fungi**. *Genome*  
975 *Biology and Evolution* 2012, **4**:240-247.
- 976 30. Hane JK, Oliver RP: **RIPCAL: a tool for alignment-based analysis of**  
977 **repeat-induced point mutations in fungal genomic sequences**. *BMC*  
978 *Bioinformatics* 2008, **9**:478.
- 979 31. Hane JK, Rouxel T, Howlett BJ, Kema GH, Goodwin SB, Oliver RP: **A novel**  
980 **mode of chromosomal evolution peculiar to filamentous Ascomycete fungi**.  
981 *Genome Biol* 2011, **12**:R45.



- 982 32. Lucía R, Gúmer P, Raúl C, Francisco S, G. PA: *Basidiomycetes Telomeres – A*  
983 *Bioinformatics Approach*. InTech; 2011.
- 984 33. Foulongne-Oriol M, Murat C, Castanera R, Ramirez L, Sonnenberg AS:  
985 **Genome-wide survey of repetitive DNA elements in the button mushroom**  
986 ***Agaricus bisporus***. *Fungal Genet Biol* 2013, **55**:6-21.
- 987 34. Edman JC: **Isolation of telomere like sequences from *Cryptococcus***  
988 ***neoformans* and their use in high-efficiency transformation**. *Mol Cell Biol*  
989 1992, **12**:2777-2783.
- 990 35. Tudzynski B: **Nitrogen regulation of fungal secondary metabolism in fungi**.  
991 *Front Microbiol* 2014, **5**:656.
- 992 36. Douglas CM: **Fungal beta(1,3)-D-glucan synthesis**. *Med Mycol* 2001, **39**  
993 **Suppl 1**:55-66.
- 994 37. Leipe DD, Koonin EV, Aravind L: **STAND, a class of P-loop NTPases**  
995 **including animal and plant regulators of programmed cell death:**  
996 **multiple, complex domain architectures, unusual phyletic patterns, and**  
997 **evolution by horizontal gene transfer**. *J Mol Biol* 2004, **343**:1-28.
- 998 38. Bidard F, Clave C, Saupe SJ: **The transcriptional response to nonself in the**  
999 **fungus *Podospira anserina***. *G3 (Bethesda)* 2013, **3**:1015-1030.
- 1000 39. Van der Nest MA, Olson A, Lind M, Velez H, Dalman K, Brandstrom Durling  
1001 M, Karlsson M, Stenlid J: **Distribution and evolution of het gene homologs**  
1002 **in the basidiomycota**. *Fungal Genet Biol* 2014, **64**:45-57.
- 1003 40. Jancova P, Anzenbacher P, Anzenbacherova E: **Phase II drug metabolizing**  
1004 **enzymes**. *Biomed Pap Med Fac Univ Palacky Olomouc Czech Repub* 2010,  
1005 **154**:103-116.
- 1006 41. James TY, Sun S, Li W, Heitman J, Kuo HC, Lee YH, Asiegbu FO, Olson A:  
1007 **Polyporales genomes reveal the genetic architecture underlying tetrapolar**  
1008 **and bipolar mating systems**. *Mycologia* 2013, **105**:1374-1390.
- 1009 42. James TY, Lee M, van Diepen LT: **A single mating-type locus composed of**  
1010 **homeodomain genes promotes nuclear migration and heterokaryosis in**  
1011 **the white-rot fungus *Phanerochaete chrysosporium***. *Eukaryot Cell* 2011,  
1012 **10**:249-261.
- 1013 43. James TY, Srivilai P, Kues U, Vilgalys R: **Evolution of the bipolar mating**  
1014 **system of the mushroom *Coprinellus disseminatus* from its tetrapolar**  
1015 **ancestors involves loss of mating-type-specific pheromone receptor**  
1016 **function**. *Genetics* 2006, **172**:1877-1891.
- 1017 44. Niculita-Hirzel H, Labbe J, Kohler A, le Tacon F, Martin F, Sanders IR, Kues  
1018 U: **Gene organization of the mating type regions in the ectomycorrhizal**  
1019 **fungus *Laccaria bicolor* reveals distinct evolution between the two mating**  
1020 **type loci**. *New Phytol* 2008, **180**:329-342.
- 1021 45. Kues U: **From two to many: multiple mating types in Basidiomycetes**.  
1022 *Fungal Biology Reviews* 2015, **29**:126-166.
- 1023 46. van Peer AF, Park S-Y, Shin P-G, Jang K-Y, Yoo Y-B, Park Y-J, Lee B-M,  
1024 Sung G-H, James TY, Kong W-S: **Comparative genomics of the mating-**  
1025 **type loci of the mushroom *Flammulina velutipes* reveals widespread**  
1026 **synteny and recent inversions**. *PLOS ONE* 2011, **6**:e22249.
- 1027 47. Lombard V, Golaconda Ramulu H, Drula E, Coutinho PM, Henrissat B: **The**  
1028 **carbohydrate-active enzymes database (CAZy) in 2013**. *Nucleic Acids Res*  
1029 2014, **42**:D490-495.
- 1030 48. Dashtban M, Schraft H, Syed TA, Qin W: **Fungal biodegradation and**  
1031 **enzymatic modification of lignin**. *Int J Biochem Mol Biol* 2010, **1**:36-50.



- 1032 49. Osbourn A: **Secondary metabolic gene clusters: evolutionary toolkits for**  
1033 **chemical innovation.** *Trends Genet* 2010, **26**:449-457.
- 1034 50. Paoletti M, Saupe SJ: **Fungal incompatibility: evolutionary origin in**  
1035 **pathogen defense?** *Bioessays* 2009, **31**:1201-1210.
- 1036 51. Poggeler S, Kuck U: **A WD40 repeat protein regulates fungal cell**  
1037 **differentiation and can be replaced functionally by the mammalian**  
1038 **homologue striatin.** *Eukaryot Cell* 2004, **3**:232-240.
- 1039 52. He Q, Cheng P, He Q, Liu Y: **The COP9 signalosome regulates the**  
1040 **Neurospora circadian clock by controlling the stability of the SCFFWD-1**  
1041 **complex.** *Genes Dev* 2005, **19**:1518-1531.
- 1042 53. Lah L, Podobnik B, Novak M, Korosec B, Berne S, Vogelsang M, Krasevec N,  
1043 Zupanec N, Stojan J, Bohlmann J, Komel R: **The versatility of the fungal**  
1044 **cytochrome P450 monooxygenase system is instrumental in xenobiotic**  
1045 **detoxification.** *Mol Microbiol* 2011, **81**:1374-1389.
- 1046 54. Nagy LG, Riley R, Bergmann PJ, Krizsan K, Martin FM, Grigoriev IV, Cullen  
1047 D, Hibbett DS: **Genetic Bases of Fungal White Rot Wood Decay Predicted**  
1048 **by Phylogenomic Analysis of Correlated Gene-Phenotype Evolution.** *Mol*  
1049 *Biol Evol* 2017, **34**:35-44.
- 1050 55. Sperschneider J, Gardiner DM, Dodds PN, Tini F, Covarelli L, Singh KB,  
1051 Manners JM, Taylor JM: **EffectorP: predicting fungal effector proteins**  
1052 **from secretomes using machine learning.** *New Phytol* 2016, **210**:743-761.
- 1053 56. Guzman-Guzman P, Aleman-Duarte MI, Delaye L, Herrera-Estrella A,  
1054 Olmedo-Monfil V: **Identification of effector-like proteins in Trichoderma**  
1055 **spp. and role of a hydrophobin in the plant-fungus interaction and**  
1056 **mycoparasitism.** *BMC Genet* 2017, **18**:16.
- 1057 57. Raj A, Stephens M, Pritchard JK: **fastSTRUCTURE: Variational Inference**  
1058 **of Population Structure in Large SNP Data Sets.** *Genetics* 2014, **197**:573-  
1059 589.
- 1060 58. Leffler EM, Bullaughey K, Matute DR, Meyer WK, Segurel L, Venkat A,  
1061 Andolfatto P, Przeworski M: **Revisiting an old riddle: what determines**  
1062 **genetic diversity levels within species?** *PLoS Biol* 2012, **10**:e1001388.
- 1063 59. Baranova MA, Logacheva MD, Penin AA, Seplyarskiy VB, Safonova YY,  
1064 Naumenko SA, Klepikova AV, Gerasimov ES, Bazykin GA, James TY,  
1065 Kondrashov AS: **Extraordinary Genetic Diversity in a Wood Decay**  
1066 **Mushroom.** *Mol Biol Evol* 2015, **32**:2775-2783.
- 1067 60. Swain E, Stukey J, McDonough V, Germann M, Liu Y, Sturley SL, Nickels  
1068 JT, Jr.: **Yeast cells lacking the ARV1 gene harbor defects in sphingolipid**  
1069 **metabolism. Complementation by human ARV1.** *J Biol Chem* 2002,  
1070 **277**:36152-36160.
- 1071 61. Olson A, Aerts A, Asiegbu F, Belbahri L, Bouzid O, Broberg A, Canback B,  
1072 Coutinho PM, Cullen D, Dalman K, et al: **Insight into trade-off between**  
1073 **wood decay and parasitism from the genome of a fungal forest pathogen.**  
1074 *New Phytol* 2012, **194**:1001-1013.
- 1075 62. Miyauchi S, Navarro D, Grisel S, Chevret D, Berrin JG, Rosso MN: **The**  
1076 **integrative omics of white-rot fungus Pycnoporus coccineus reveals co-**  
1077 **regulated CAZymes for orchestrated lignocellulose breakdown.** *PLoS One*  
1078 2017, **12**:e0175528.
- 1079 63. Wendland J: *Growth, Differentiation and Sexuality*. 3 edn: Springer; 2016.

- 1080 64. Hattori T, Abe Y, Usugi T: **Distribution of clones of *Phellinus noxius* in a**  
1081 **windbreak on Ishigaki Island.** *European Journal of Forest Pathology* 1996,  
1082 **26:69-80.**
- 1083 65. Klopfenstein NB, Pitman EWI, Hanna JW, Cannon PG, Stewart JE, Sahashi N,  
1084 Ota Y, Hattori T, Akiba M, Shuey L, et al: **A preliminary bioclimatic**  
1085 **approach to predicting potential distribution of *Phellinus noxius* and**  
1086 **geographical areas at risk from invasion.** In *Proceedings of the 63rd Annual*  
1087 *Western International Forest Disease Work Conference.* 2016: 137-139.
- 1088 66. Chin C-S, Peluso P, Sedlazeck FJ, Nattestad M, Concepcion GT, Clum A,  
1089 Dunn C, O'Malley R, Figueroa-Balderas R, Morales-Cruz A, et al: **Phased**  
1090 **diploid genome assembly with single-molecule real-time sequencing.**  
1091 *Nature Methods* 2016, **13:1050-1054.**
- 1092 67. Chin C-S, Alexander DH, Marks P, Klammer AA, Drake J, Heiner C, Clum A,  
1093 Copeland A, Huddleston J, Eichler EE, et al: **Nonhybrid, finished microbial**  
1094 **genome assemblies from long-read SMRT sequencing data.** *Nature*  
1095 *Methods* 2013, **10:563-569.**
- 1096 68. Lam KK, LaButti K, Khalak A, Tse D: **FinisherSC: a repeat-aware tool for**  
1097 **upgrading de novo assembly using long reads.** *Bioinformatics* 2015,  
1098 **31:3207-3209.**
- 1099 69. Bolger AM, Lohse M, Usadel B: **Trimmomatic: a flexible trimmer for**  
1100 **Illumina sequence data.** *Bioinformatics* 2014, **30:2114-2120.**
- 1101 70. Bankevich A, Nurk S, Antipov D, Gurevich AA, Dvorkin M, Kulikov AS,  
1102 Lesin VM, Nikolenko SI, Pham S, Prjibelski AD, et al: **SPAdes: A New**  
1103 **Genome Assembly Algorithm and Its Applications to Single-Cell**  
1104 **Sequencing.** *Journal of Computational Biology* 2012, **19:455-477.**
- 1105 71. Butler J, MacCallum I, Kleber M, Shlyakhter IA, Belmonte MK, Lander ES,  
1106 Nusbaum C, Jaffe DB: **ALLPATHS: de novo assembly of whole-genome**  
1107 **shotgun microreads.** *Genome Res* 2008, **18:810-820.**
- 1108 72. Walker BJ, Abeel T, Shea T, Priest M, Abouelliel A, Sakthikumar S, Cuomo  
1109 CA, Zeng Q, Wortman J, Young SK, Earl AM: **Pilon: An Integrated Tool**  
1110 **for Comprehensive Microbial Variant Detection and Genome Assembly**  
1111 **Improvement.** *PLoS ONE* 2014, **9:e112963.**
- 1112 73. Wences AH, Schatz MC: **Metassembler: merging and optimizing de novo**  
1113 **genome assemblies.** *Genome Biology* 2015, **16.**
- 1114 74. Hunt M, Kikuchi T, Sanders M, Newbold C, Berriman M, Otto TD: **REAPR:**  
1115 **a universal tool for genome assembly evaluation.** *Genome biology* 2013,  
1116 **14:R47.**
- 1117 75. Stanke M, Tzvetkova A, Morgenstern B: **AUGUSTUS at EGASP: using**  
1118 **EST, protein and genomic alignments for improved gene prediction in the**  
1119 **human genome.** *Genome biology* 2006, **7 Suppl 1:S11.11-18.**
- 1120 76. Parra G, Bradnam K, Korf I: **CEGMA: a pipeline to accurately annotate**  
1121 **core genes in eukaryotic genomes.** *Bioinformatics (Oxford, England)* 2007,  
1122 **23:1061-1067.**
- 1123 77. Hoff KJ, Lange S, Lomsadze A, Borodovsky M, Stanke M: **BRAKER1:**  
1124 **Unsupervised RNA-Seq-Based Genome Annotation with GeneMark-ET**  
1125 **and AUGUSTUS.** *Bioinformatics* 2016, **32:767-769.**
- 1126 78. Borodovsky M, Lomsadze A: **Eukaryotic gene prediction using**  
1127 **GeneMark.hmm-E and GeneMark-ES.** *Curr Protoc Bioinformatics* 2011,  
1128 **Chapter 4:Unit 4 6 1-10.**

- 1129 79. Conesa A, Gotz S, Garcia-Gomez JM, Terol J, Talon M, Robles M: **Blast2GO:**  
1130 **a universal tool for annotation, visualization and analysis in functional**  
1131 **genomics research.** *Bioinformatics* 2005, **21**:3674-3676.
- 1132 80. Lavezzo E, Falda M, Fontana P, Bianco L, Toppo S: **Enhancing protein**  
1133 **function prediction with taxonomic constraints--The Argot2.5 web server.**  
1134 *Methods* 2016, **93**:15-23.
- 1135 81. Yin Y, Mao X, Yang J, Chen X, Mao F, Xu Y: **dbCAN: a web resource for**  
1136 **automated carbohydrate-active enzyme annotation.** *Nucleic Acids Res*  
1137 2012, **40**:W445-451.
- 1138 82. Weber T, Blin K, Duddela S, Krug D, Kim HU, Bruccoleri R, Lee SY,  
1139 Fischbach MA, Müller R, Wohlleben W, et al: **antiSMASH 3.0—a**  
1140 **comprehensive resource for the genome mining of biosynthetic gene**  
1141 **clusters.** *Nucleic Acids Research* 2015, **43**:W237-W243.
- 1142 83. Edgar RC: **Search and clustering orders of magnitude faster than BLAST.**  
1143 *Bioinformatics* 2010, **26**:2460-2461.
- 1144 84. Finn RD, Coghill P, Eberhardt RY, Eddy SR, Mistry J, Mitchell AL, Potter  
1145 SC, Punta M, Qureshi M, Sangrador-Vegas A, et al: **The Pfam protein**  
1146 **families database: towards a more sustainable future.** *Nucleic Acids*  
1147 *Research* 2016, **44**:D279-D285.
- 1148 85. Ellinghaus D, Kurtz S, Willhoeft U: **LTRharvest, an efficient and flexible**  
1149 **software for de novo detection of LTR retrotransposons.** *BMC*  
1150 *Bioinformatics* 2008, **9**:18.
- 1151 86. Emms DM, Kelly S: **OrthoFinder: solving fundamental biases in whole**  
1152 **genome comparisons dramatically improves orthogroup inference**  
1153 **accuracy.** *Genome Biol* 2015, **16**:157.
- 1154 87. Katoh K, Standley DM: **MAFFT: iterative refinement and additional**  
1155 **methods.** *Methods Mol Biol* 2014, **1079**:131-146.
- 1156 88. Stamatakis A: **RAXML-VI-HPC: maximum likelihood-based phylogenetic**  
1157 **analyses with thousands of taxa and mixed models.** *Bioinformatics (Oxford,*  
1158 *England)* 2006, **22**:2688-2690.
- 1159 89. Felsenstein J: **PHYLIP (Phylogeny Inference Package) version 3.6.**  
1160 *Distributed by the author Department of Genome Sciences, University of*  
1161 *Washington, Seattle* 2005.
- 1162 90. A A, J R: **topGO: Enrichment Analysis for Gene Ontology.** *R package*  
1163 *version 2260* 2016.
- 1164 91. Dobin A, Davis CA, Schlesinger F, Drenkow J, Zaleski C, Jha S, Batut P,  
1165 Chaisson M, Gingeras TR: **STAR: ultrafast universal RNA-seq aligner.**  
1166 *Bioinformatics* 2012, **29**:15-21.
- 1167 92. Liao Y, Smyth GK, Shi W: **featureCounts: an efficient general purpose**  
1168 **program for assigning sequence reads to genomic features.** *Bioinformatics*  
1169 2014, **30**:923-930.
- 1170 93. Love MI, Huber W, Anders S: **Moderated estimation of fold change and**  
1171 **dispersion for RNA-seq data with DESeq2.** *Genome Biology* 2014, **15**.
- 1172 94. Young MD, Wakefield MJ, Smyth GK, Oshlack A: **Gene ontology analysis**  
1173 **for RNA-seq: accounting for selection bias.** *Genome Biology* 2010, **11**:R14.
- 1174 95. Jones P, Binns D, Chang H-Y, Fraser M, Li W, McAnulla C, McWilliam H,  
1175 Maslen J, Mitchell A, Nuka G, et al: **InterProScan 5: genome-scale protein**  
1176 **function classification.** *Bioinformatics* 2014, **30**:1236-1240.

- 1177 96. Grigoriev IV, Nikitin R, Haridas S, Kuo A, Ohm R, Otilar R, Riley R,  
1178 Salamov A, Zhao X, Korzeniewski F, et al: **MycoCosm portal: gearing up**  
1179 **for 1000 fungal genomes.** *Nucleic Acids Research* 2014, **42**:D699-D704.
- 1180 97. Guy L, Roat Kultima J, Andersson SGE: **genoPlotR: comparative gene and**  
1181 **genome visualization in R.** *Bioinformatics* 2010, **26**:2334-2335.
- 1182 98. Kurtz S, Phillippy A, Delcher AL, Smoot M, Shumway M, Antonescu C,  
1183 Salzberg SL: **Versatile and open software for comparing large genomes.**  
1184 *Genome Biology* 2004, **5**:R12.
- 1185 99. Schwartz S, Zhang Z, Frazer KA, Smit A, Riemer C, Bouck J, Gibbs R,  
1186 Hardison R, Miller W: **PipMaker--a web server for aligning two genomic**  
1187 **DNA sequences.** *Genome research* 2000, **10**:577--586.
- 1188 100. Maurer-Stroh S, Eisenhaber F: **Refinement and prediction of protein**  
1189 **prenylation motifs.** *Genome Biology* 2005, **6**:R55.
- 1190 101. Li H, Handsaker B, Wysoker A, Fennell T, Ruan J, Homer N, Marth G,  
1191 Abecasis G, Durbin R: **The Sequence Alignment/Map format and**  
1192 **SAMtools.** *Bioinformatics (Oxford, England)* 2009, **25**:2078-2079.
- 1193 102. Koboldt DC, Zhang Q, Larson DE, Shen D, McLellan MD, Lin L, Miller CA,  
1194 Mardis ER, Ding L, Wilson RK: **VarScan 2: Somatic mutation and copy**  
1195 **number alteration discovery in cancer by exome sequencing.** *Genome*  
1196 *Research* 2012, **22**:568-576.
- 1197 103. E G, G M: **Haplotype-based variant detection from short-read sequencing.**  
1198 *arXiv* 2012, **1207**:3907.
- 1199 104. Price MN, Dehal PS, Arkin AP: **FastTree: Computing Large Minimum**  
1200 **Evolution Trees with Profiles instead of a Distance Matrix.** *Molecular*  
1201 *Biology and Evolution* 2009, **26**:1641-1650.
- 1202 105. Chang CC, Chow CC, Tellier LC, Vattikuti S, Purcell SM, Lee JJ: **Second-**  
1203 **generation PLINK: rising to the challenge of larger and richer datasets.**  
1204 *Gigascience* 2015, **4**:7.
- 1205 106. Danecek P, Auton A, Abecasis G, Albers CA, Banks E, DePristo MA,  
1206 Handsaker RE, Lunter G, Marth GT, Sherry ST, et al: **The variant call**  
1207 **format and VCFtools.** *Bioinformatics* 2011, **27**:2156-2158.
- 1208 107. Vilella AJ, Blanco-Garcia A, Hutter S, Rozas J: **VariScan: Analysis of**  
1209 **evolutionary patterns from large-scale DNA sequence polymorphism data.**  
1210 *Bioinformatics* 2005, **21**:2791-2793.
- 1211

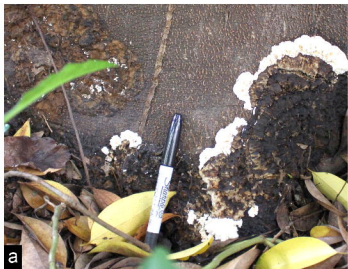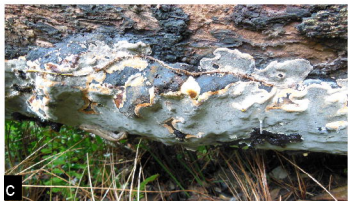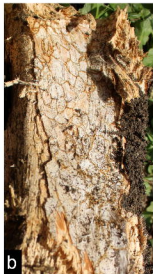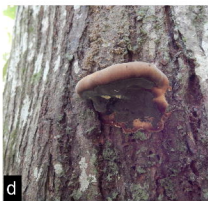

e

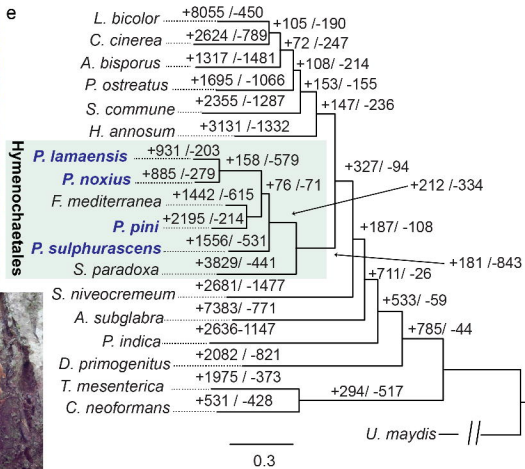



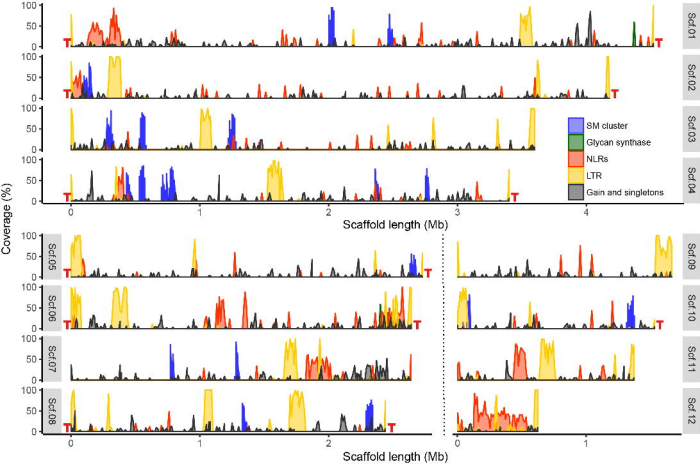



a

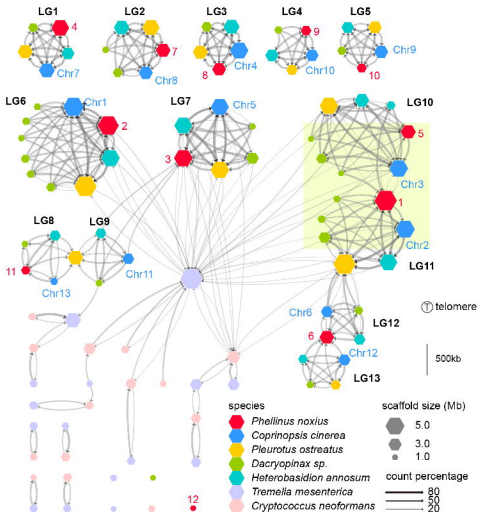

b

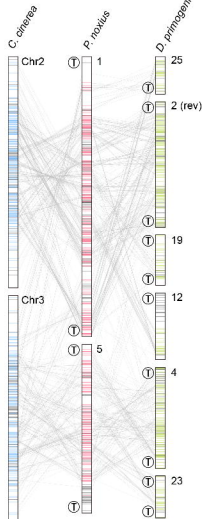

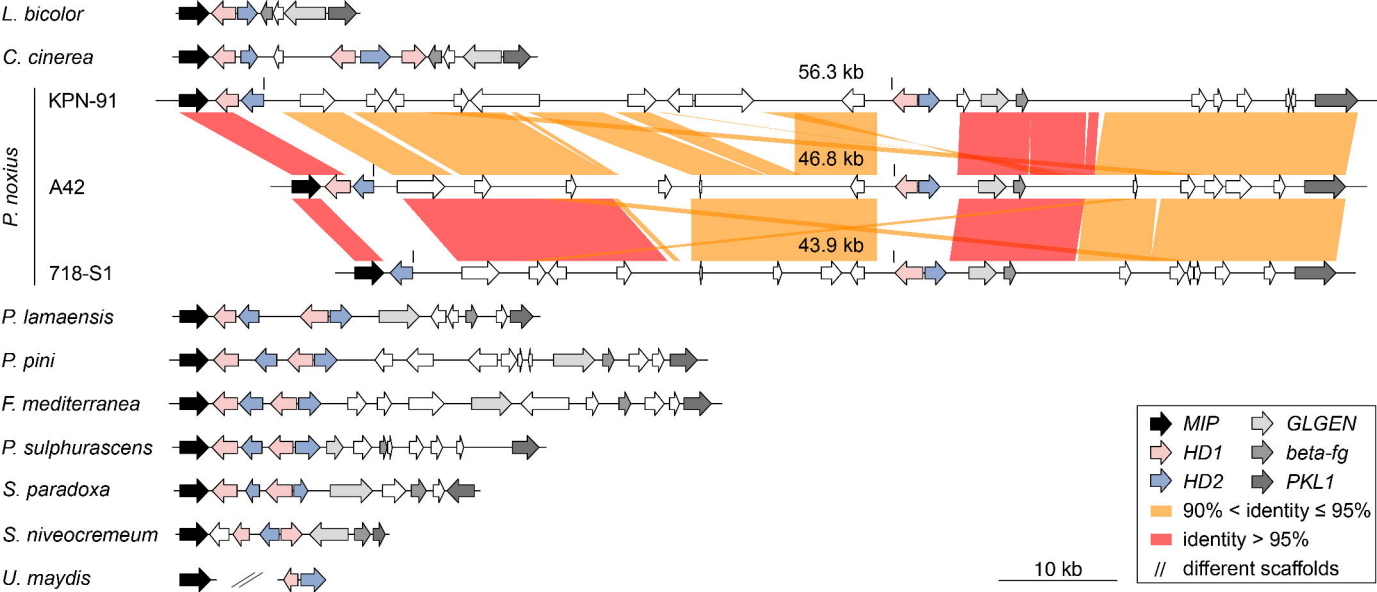

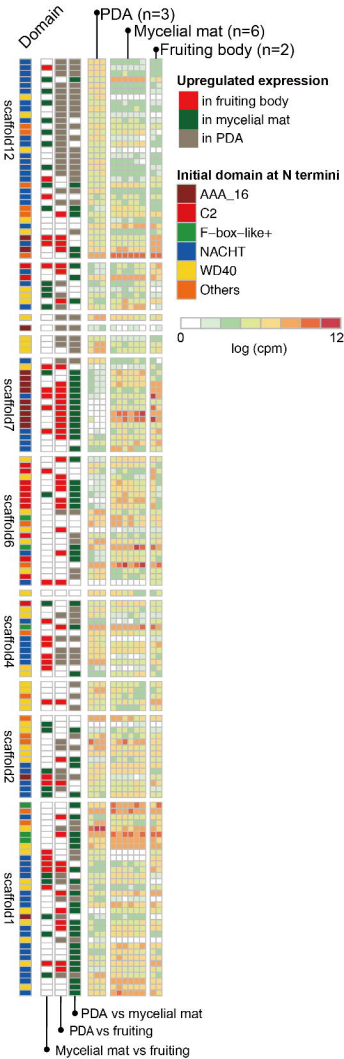



| Population                             | Analyzed Sites | Segregating sites (S) | Singletons | $\theta\pi$ (x1,000) | $\theta_s$ (x1,000) | Tajima's D |
|----------------------------------------|----------------|-----------------------|------------|----------------------|---------------------|------------|
| <b>Whole genome</b>                    |                |                       |            |                      |                     |            |
| Ogasawara (n=9)                        | 30,028,158     | 506,231               | 174,924    | 6.6                  | 6.3                 | 0.3        |
| TaiwanRyukyu (n=51)                    | 31,376,691     | 1,538,598             | 545,324    | 8.0                  | 10.9                | -0.9       |
| TaiwanRyukyu subset (n=9) <sup>1</sup> | 30,640,276     | 749,681               | 408,021    | 8.1                  | 8.9                 | -0.5       |
| <b>Synonymous Sites</b>                |                |                       |            |                      |                     |            |
| Ogasawara (n=9)                        | 4,651,751      | 182,879               | 59,464     | 15.8                 | 14.7                | 0.4        |
| TaiwanRyukyu (n=51)                    | 4,758,211      | 513,717               | 161,353    | 19.2                 | 23.6                | -0.7       |
| TaiwanRyukyu subset (n=9) <sup>1</sup> | 4,704,161      | 269,060               | 136,780    | 19.3                 | 20.5                | -0.4       |
| <b>Replacement Sites</b>               |                |                       |            |                      |                     |            |
| Ogasawara (n=9)                        | 9,794,069      | 71,497                | 25,981     | 2.9                  | 2.8                 | 0.2        |
| TaiwanRyukyu (n=51)                    | 10,018,114     | 230,689               | 93,385     | 3.6                  | 5.3                 | -1.2       |
| TaiwanRyukyu subset (n=9) <sup>1</sup> | 9,904,211      | 103,907               | 60,313     | 3.6                  | 4.0                 | -0.6       |

<sup>1</sup> A random of nine isolates were chosen to repeat the analysis.
